# Supplementary material for: Boundary cap cells constrain spinal motor neuron somal migration at motor exit points by a semaphorin-plexin mechanism
Source: Springer Nature journal article supplement (doi:10.1186/1749-8104-2-21), 2007-10-30

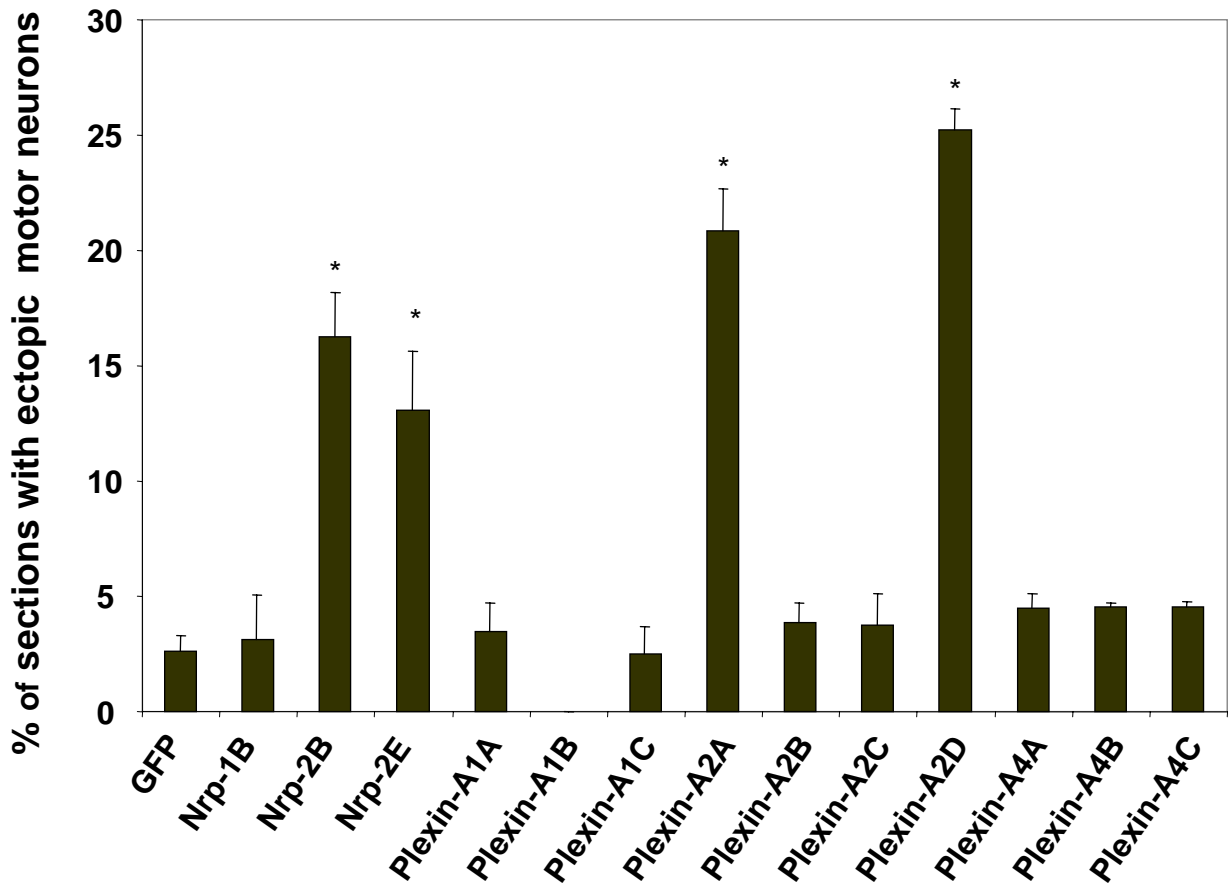

Supplement: Additional file 3 [file 1749-8104-2-21-s3.pdf]
